# Supplementary material for: Characterization of Iron Core–Gold Shell Nanoparticles for Anti-Cancer Treatments: Chemical and Structural Transformations During Storage and Use
Source: MDPI journal article supplement (doi:10.3390/ma11122572), 2018-12-17
Supplement: s1 [file s1]

Supplementary information

# Characterisation of Iron Core–Gold Shell Nanoparticles for Anti-Cancer Treatments: Chemical and Structural Transformations During Storage and Use

Ya-Na Wu<sup>1,2,\*</sup>, Dar-Bin Shieh<sup>1,3</sup>, Li-Xing Yang<sup>4</sup>, Hwo-Shuenn Sheu<sup>5</sup>, Rongkun Zheng<sup>6</sup>, Pall Thordarson<sup>7</sup>, Dong-Hwang Chen<sup>8</sup>, and Filip Braet<sup>6,9</sup>

<sup>1</sup> Institute of Oral Medicine and Department of Stomatology, College of Medicine, National Cheng Kung University Hospital, National Cheng Kung University, Tainan, 70101, Taiwan; dbshieh@mail.ncku.edu.tw

<sup>2</sup> Institute of Biological Chemistry, Academia Sinica, Taipei, 11529, Taiwan

<sup>3</sup> Center for Micro/Nano Science and Technology, Advanced Optoelectronic Technology Center, Innovation Center for Advanced Medical Device Technology, National Cheng Kung University, Tainan, 70101, Taiwan

<sup>4</sup> Institute of Basic Medical Sciences, National Cheng Kung University, Tainan, 70101, Taiwan; fingerzoo@gmail.com

<sup>5</sup> National Synchrotron Radiation Research Center, Hsinchu Science-Based Industrial Park, Hsinchu 30076, Taiwan; hsheu@nsrrc.org.tw

<sup>6</sup> Australian Centre for Microscopy & Microanalysis, The University of Sydney, Sydney, NSW 2006, Australia; rongkun.zheng@sydney.edu.au

<sup>7</sup> School of Chemistry, The University of New South Wales, Sydney, NSW 2052, Australia; p.thordarson@unsw.edu.au

<sup>8</sup> Department of Chemical Engineering, National Cheng Kung University, Tainan 70101, Taiwan; chendh@mail.ncku.edu.tw

<sup>9</sup> School of Medical Sciences (Discipline of Anatomy and Histology)—The Bosch Institute, The University of Sydney, NSW 2006, Australia; filip.braet@sydney.edu.au

\* Correspondence: yana.wu@gmail.com; Tel.: +886-6-235-3535 ext. 5377

Received: date; Accepted: date; Published: date

## Materials and Methods:

### Characterization of freshly synthesized Fe@Au

Fe@Au nanoparticles were diluted into ethanol and quickly applied onto copper grids coated with a thin carbon support film. The specimens were immediately observed at an accelerating voltage of 300 kV using a 3000F TEM (JEOL, Tokyo, Japan), equipped with a SC1000 11-megapixel CCD camera (Gatan, CA, USA). X-ray diffraction (XRD) analysis of the nanoparticles was done using Cu/K  $\alpha$ -radiation, generated at 40 kV and 30 mA (average wavelength is 0.15418 nm), in a Bruker X-ray diffractometer (RX-III; Shimadzu Corp., Kyoto, Japan). XRD patterns ( $20^\circ < 2\theta < 90^\circ$ ) were collected at a scan rate of  $5^\circ$  per minute.

### Fe/O atomic ratio of reconstituted and aged Fe@Au

Fe@Au nanoparticles were diluted into ethanol and quickly applied onto copper grids coated with a thin carbon support film. The specimens were immediately observed at an accelerating voltage of 200 kV using a 2100F TEM (JEOL, Tokyo, Japan), equipped with an EDXS system. The mean Fe/O ratio of reconstituted and aged Fe@Au is  $0.447 \pm 0.07$  and  $0.314 \pm 0.09$ , respectively, which is significantly different ( $p = 0.0001$ , Student's T test).

### Results:

Table S1. The Fe/O atomic ratio data of reconstituted and aged Fe@Au obtained through EDXS. Each line of the table is the data from a single-field EDXS analysis of the two samples, with the mean  $\pm$  standard error given in the final row in bold.

| Reconstituted Fe@Au, atomic %    |                                  |                                  | Aged Fe@Au, atomic %             |                                  |                                  |
|----------------------------------|----------------------------------|----------------------------------|----------------------------------|----------------------------------|----------------------------------|
| O                                | Fe                               | Au                               | O                                | Fe                               | Au                               |
| 64.5                             | 23.5                             | 11.1                             | 63                               | 25.5                             | 11.5                             |
| 41.1                             | 20.8                             | 38.1                             | 46.4                             | 20.7                             | 33                               |
| 61.5                             | 26.1                             | 12.4                             | 62.7                             | 20.9                             | 16.4                             |
| 51.4                             | 26.4                             | 22.2                             | 61.7                             | 21.6                             | 16.7                             |
| 61.4                             | 23.3                             | 15.2                             | 63.1                             | 17.5                             | 19.4                             |
| 55.1                             | 22.2                             | 22.8                             | 68.2                             | 20.6                             | 11.2                             |
| 53.4                             | 30.1                             | 16.4                             | 60.6                             | 23.7                             | 15.8                             |
| 57.9                             | 25.1                             | 19                               | 48.2                             | 19                               | 32.8                             |
| 50                               | 24.4                             | 25.6                             | 61                               | 25.6                             | 13.4                             |
| 40.3                             | 18.7                             | 40.9                             | 60.7                             | 5.5                              | 33.7                             |
| 65.4                             | 23.5                             | 11.1                             | 65.6                             | 19.6                             | 14.8                             |
| 45.6                             | 23.8                             | 30.6                             | 69.9                             | 17.8                             | 12.3                             |
| 63.3                             | 24.4                             | 12.4                             | 66.8                             | 14.7                             | 18.5                             |
|                                  |                                  |                                  | 70.6                             | 17.5                             | 11.9                             |
|                                  |                                  |                                  | 57.4                             | 23.6                             | 19                               |
|                                  |                                  |                                  | 61.7                             | 19.8                             | 18.5                             |
|                                  |                                  |                                  | 62                               | 23.6                             | 14.4                             |
|                                  |                                  |                                  | 60.8                             | 17.4                             | 21.8                             |
|                                  |                                  |                                  | 60.9                             | 18.8                             | 20.3                             |
|                                  |                                  |                                  | 75.7                             | 10.3                             | 14                               |
| <b><math>54.7 \pm 2.4</math></b> | <b><math>24.0 \pm 0.8</math></b> | <b><math>21.4 \pm 2.8</math></b> | <b><math>61.4 \pm 1.9</math></b> | <b><math>19.4 \pm 1.4</math></b> | <b><math>19.2 \pm 2.3</math></b> |

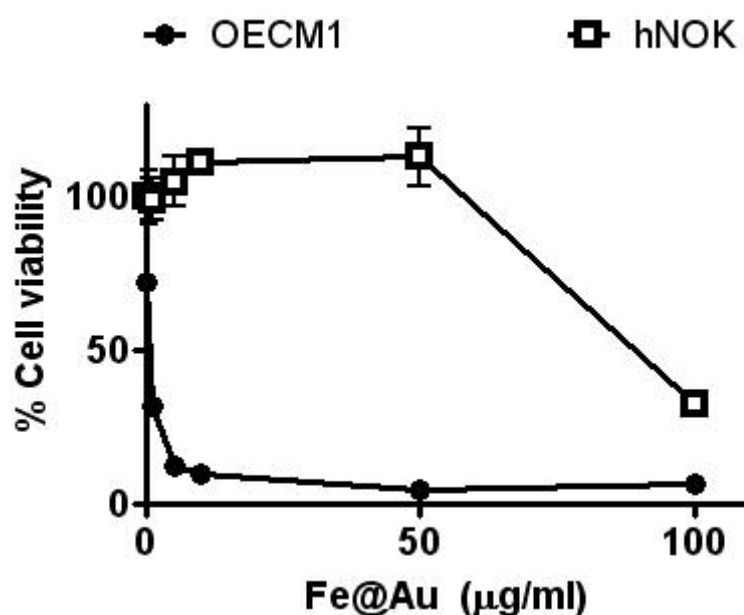

Figure S1. Quality control data on the anti-cancer selective effects of Fe@Au. Prior to further experiments, the cancer specific anti-cancer effect of Fe@Au was estimated by WST-1 assay with 48 hours' treatment. The  $IC_{50}$  of the freshly synthesized Fe@Au in OECM1 is between 1 and 5  $\mu\text{g/mL}$ , while a significant decrease in cellular viability was only observed at doses exceeding 50  $\mu\text{g/mL}$  in hNOK cells ( $p = 0.0053$ , Student t-test; compared to Fe@Au-treated OECM1).

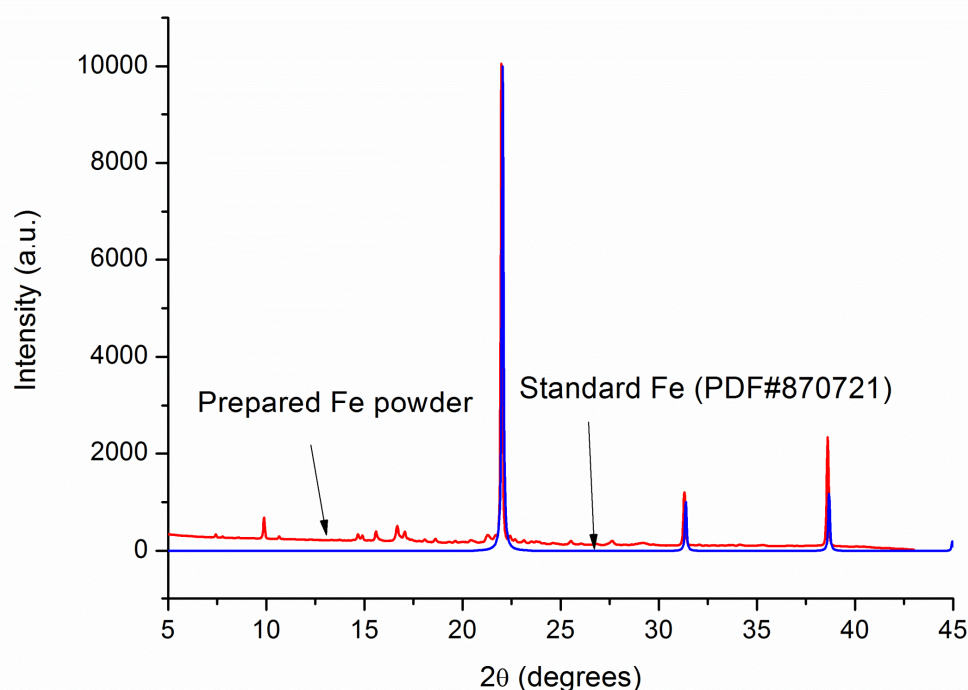

Figure S2. Investigation of synthesized Fe-core-alone particles by synchrotron radiation based XRD. To avoid the problems of overlapping peaks from Fe and Au under XRD of Fe@Au, we synthesized pure Fe core nanoparticles and analyzed them by XRD. This shows that the major peaks are identical with the standard powder diffraction file of elemental Fe.
